# Supplementary material for: The Rice BZ1 Locus Is Required for Glycosylation of Arabinogalactan Proteins and Galactolipid and Plays a Role in both Mechanical Strength and Leaf Color
Source: PubMed Central journal article supplement (PMC7300173; doi:10.1186/s12284-020-00400-9), 2020-06-17
Supplement: 12284_2020_400_MOESM1_ESM.pdf [file 12284_2020_400_MOESM1_ESM.pdf]

## Supplemental figures and tables

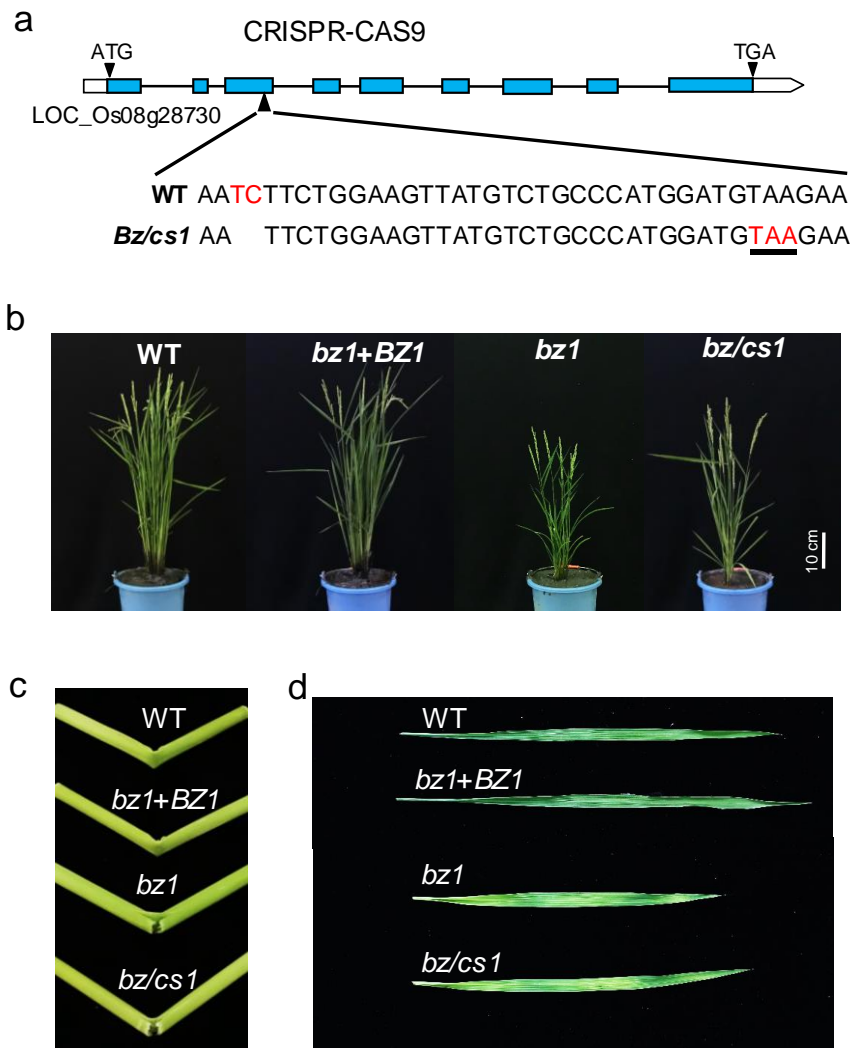

**Figure S1.** The *BZ1* gene is confirmed to be responsible for the brittle culm and zebra leaf phenotypes. **a**, The transgenic plants *bz/cs1* generated by CRISPR/Cas9 approach had two base pairs deletion in the third exon of LOC\_Os08g28730. The arrowhead indicates two base pairs deletion (showing in red letters) in the third exon inducing a premature translational stop codon (underlined). **b–d**, The complementary lines showed restored phenotypes as wild-type (**b**) whereas the *bz/cs1* displayed brittle culm (**c**) and zebra leaf phenotypes (**d**) as similar as *bz1*.

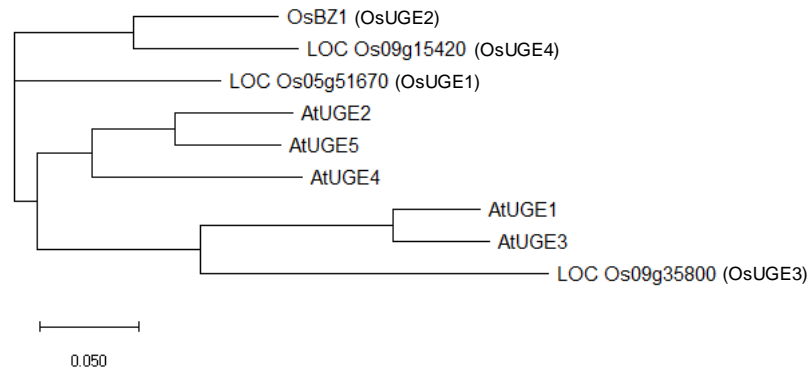

**Figure S2.** Phylogeny of UGE isoforms in rice and *Arabidopsis* based on maximum likelihood.

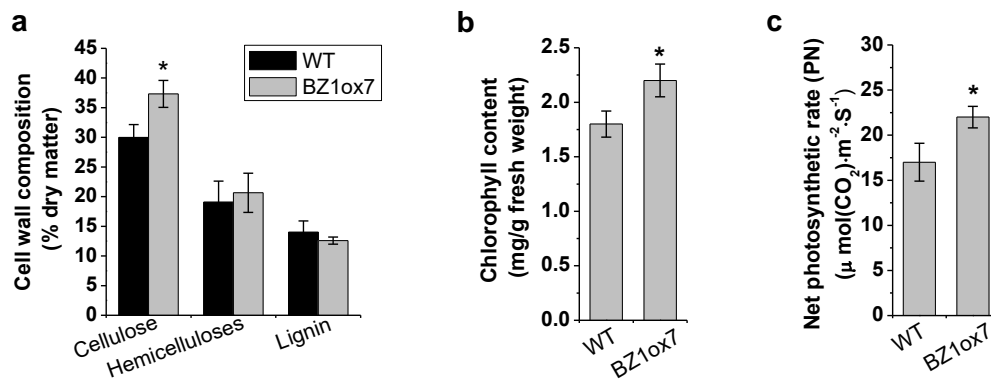

**Figure S3.** Comparison of cell wall composition (a), chlorophyll content (b) and photosynthetic efficiency (c) between WT and BZ1ox7 transgenic line \* indicates significant differences between WT and BZ1ox7 by *t*-test at  $P < 0.05$ .

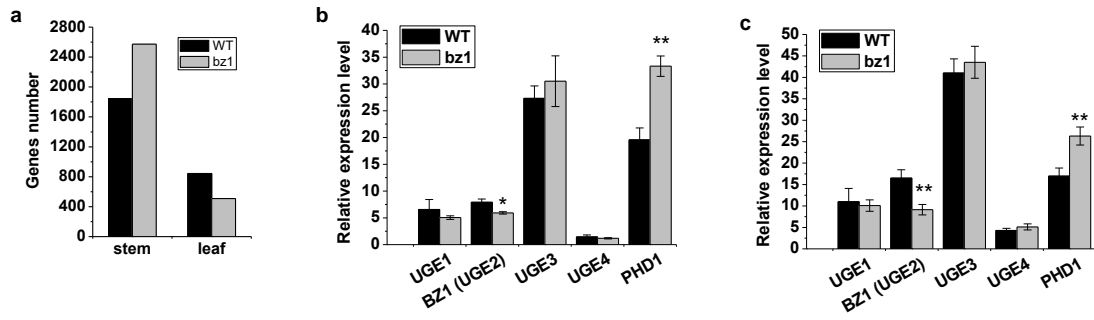

**Figure S4.** a, Number of genes that are upregulated and downregulated in stem and leaf of *bz1* compared with those in the WT. b, Relative expression level of *UGEs* and *PHD1* based on RNA-Sequencing analysis. c, Relative expression level of *UGEs* and *PHD1* based on qRT-PCR assay.

**Table S1.** Comparison of expression levels of putative AGPs biosynthesis-related genes between WT and *bz1* plants by stem RNA-Sequencing analysis.

| Name         | Locus          | RPKM   |            | log <sub>2</sub><br>Ratio | <i>p</i> | FDR  | change |
|--------------|----------------|--------|------------|---------------------------|----------|------|--------|
|              |                | WT     | <i>bz1</i> |                           |          |      |        |
| <i>AGP1</i>  | LOC_Os08g37630 | 11.51  | 3.28       | -1.62                     | 0.00     | 0.01 | down   |
| <i>AGP2</i>  | LOC_Os01g71170 | 98.80  | 48.70      | -0.85                     | 0.00     | 0.01 | down   |
| <i>AGP3</i>  | LOC_Os03g08940 | 103.99 | 77.57      | -0.19                     | 0.76     | 0.86 |        |
| <i>AGP12</i> | LOC_Os01g02010 | 132.41 | 194.44     | 0.74                      | 0.01     | 0.03 | up     |
| <i>AGP14</i> | LOC_Os01g37950 | 448.79 | 261.87     | -0.59                     | 0.03     | 0.09 | down   |
| <i>AGP17</i> | LOC_Os01g55220 | 35.09  | 3.39       | -3.18                     | 0.00     | 0.00 | down   |
| <i>AGP19</i> | LOC_Os01g57040 | 24.39  | 29.73      | 0.50                      | 0.12     | 0.25 |        |
| <i>AGP20</i> | LOC_Os02g16500 | 278.33 | 115.58     | -1.07                     | 0.00     | 0.00 | down   |
| <i>AGP21</i> | LOC_Os02g48710 | 614.19 | 1155.84    | 1.10                      | 0.00     | 0.00 | up     |
| <i>AGP23</i> | LOC_Os05g12580 | 285.37 | 162.80     | -0.60                     | 0.09     | 0.20 |        |
| <i>AGP24</i> | LOC_Os06g21400 | 48.10  | 197.49     | 2.30                      | 0.03     | 0.10 | up     |
| <i>AGP26</i> | LOC_Os06g30920 | 22.95  | 21.04      | 0.09                      | 0.78     | 0.87 |        |
| <i>AGP27</i> | LOC_Os07g38630 | 44.06  | 47.76      | 0.35                      | 0.42     | 0.59 |        |
| <i>AGP29</i> | LOC_Os01g42210 | 1.77   | 0.83       | -0.90                     | 0.04     | 0.12 | down   |
| <i>AGP31</i> | LOC_Os03g63540 | 26.13  | 30.61      | 0.42                      | 0.14     | 0.28 |        |
| <i>LLA1</i>  | LOC_Os03g26820 | 26.43  | 17.41      | -0.42                     | 0.14     | 0.28 |        |
| <i>LLA6</i>  | LOC_Os07g07790 | 0.59   | 2.22       | 2.07                      | 0.01     | 0.05 | up     |
| <i>LLA7</i>  | LOC_Os07g43290 | 15.56  | 10.96      | -0.33                     | 0.27     | 0.44 |        |
| <i>FLA1</i>  | LOC_Os04g48490 | 10.48  | 1.17       | -3.00                     | 0.00     | 0.00 | down   |
| <i>FLA2</i>  | LOC_Os03g03600 | 33.55  | 47.08      | 0.67                      | 0.01     | 0.05 | up     |
| <i>FLA3</i>  | LOC_Os08g23180 | 93.72  | 116.95     | 0.51                      | 0.06     | 0.15 |        |
| <i>FLA4</i>  | LOC_Os08g38270 | 63.22  | 77.08      | 0.50                      | 0.11     | 0.24 |        |
| <i>FLA5</i>  | LOC_Os08g39270 | 67.26  | 28.85      | -1.04                     | 0.00     | 0.00 | down   |
| <i>FLA6</i>  | LOC_Os05g48900 | 254.09 | 327.34     | 0.56                      | 0.04     | 0.11 | up     |
| <i>FLA7</i>  | LOC_Os01g47780 | 354.01 | 372.81     | 0.27                      | 0.31     | 0.49 |        |
| <i>FLA8</i>  | LOC_Os01g06580 | 150.68 | 208.37     | 0.65                      | 0.02     | 0.06 | up     |
| <i>FLA9</i>  | LOC_Os05g07060 | 180.56 | 259.12     | 0.69                      | 0.01     | 0.04 | up     |
| <i>FLA10</i> | LOC_Os09g30010 | 3.41   | 1.33       | -1.17                     | 0.00     | 0.02 | down   |
| <i>FLA11</i> | LOC_Os09g07350 | 158.94 | 296.77     | 1.09                      | 0.00     | 0.00 | up     |
| <i>FLA12</i> | LOC_Os01g62380 | 7.90   | 4.93       | -0.50                     | 0.10     | 0.22 |        |
| <i>FLA15</i> | LOC_Os02g20560 | 4.13   | 12.81      | 1.82                      | 0.00     | 0.00 | down   |
| <i>FLA16</i> | LOC_Os07g06680 | 301.56 | 464.02     | 0.81                      | 0.00     | 0.02 | up     |
| <i>FLA17</i> | LOC_Os03g57490 | 0.77   | 0.68       | 0.04                      | 0.93     | 0.96 |        |
| <i>FLA21</i> | LOC_Os02g49420 | 2.23   | 0.19       | -3.37                     | 0.00     | 0.00 | down   |
| <i>FLA24</i> | LOC_Os03g57460 | 100.11 | 175.04     | 1.02                      | 0.01     | 0.03 |        |
| <i>FLA26</i> | LOC_Os05g38500 | 4.90   | 5.16       | 0.26                      | 0.41     | 0.59 |        |
| <i>FLA27</i> | LOC_Os09g30486 | 78.36  | 96.39      | 0.49                      | 0.07     | 0.17 |        |
| <i>ELA2</i>  | LOC_Os02g06670 | 4.73   | 3.36       | -0.32                     | 0.36     | 0.53 |        |

**Table S2.** Comparison of expression levels of leaf color associated genes between WT and *bz1* plants by leaf RNA-Sequencing analysis.

| Gene                                     | Locus          | WT     | <i>bz1</i> | logFC | P Value | FDR  | Change |
|------------------------------------------|----------------|--------|------------|-------|---------|------|--------|
| <i>DI; RGA1; D89</i>                     | LOC_Os05g26890 | 62.91  | 75.88      | 0.27  | 0.11    | 0.35 |        |
| <i>Spl11</i>                             | LOC_Os12g38210 | 19.83  | 18.05      | -0.14 | 0.43    | 0.71 |        |
| <i>sp15; SF3b3; OsSL5</i>                | LOC_Os07g10390 | 7.11   | 6.70       | -0.09 | 0.62    | 0.84 |        |
| <i>Se5; OsHY1; OsHO1; ygl2; grc1</i>     | LOC_Os06g40080 | 167.01 | 159.34     | -0.06 | 0.71    | 0.88 |        |
| <i>OsDVR</i>                             | LOC_Os03g22780 | 68.84  | 83.87      | 0.29  | 0.08    | 0.28 |        |
| <i>YGL1; ygl80</i>                       | LOC_Os05g28200 | 80.51  | 118.72     | 0.56  | 0.00    | 0.03 | Up     |
| <i>OsChIH</i>                            | LOC_Os03g20700 | 323.51 | 594.44     | 0.88  | 0.00    | 0.00 | Up     |
| <i>OsCAO1; PGL</i>                       | LOC_Os10g41780 | 44.14  | 80.68      | 0.87  | 0.00    | 0.01 | Up     |
| <i>NAL9; VYL; ClpP</i>                   | LOC_Os03g29810 | 41.60  | 55.31      | 0.41  | 0.02    | 0.12 |        |
| <i>Chl1; OsChLD; ygl3; Ygl7; ygl98</i>   | LOC_Os03g59640 | 156.92 | 236.01     | 0.59  | 0.00    | 0.01 | Up     |
| <i>Ch9; OsChll</i>                       | LOC_Os03g36540 | 210.19 | 316.47     | 0.59  | 0.00    | 0.01 | Up     |
| <i>NYC1</i>                              | LOC_Os01g12710 | 434.41 | 300.22     | -0.53 | 0.00    | 0.01 | Down   |
| <i>SGR</i>                               | LOC_Os09g36200 | 1.40   | 2.31       | 0.72  | 0.03    | 0.14 |        |
| <i>v2</i>                                | LOC_Os03g20460 | 12.16  | 13.91      | 0.19  | 0.35    | 0.64 |        |
| <i>OsCRTISO; ZEBRA2; PHS3; ZL2; MHZ5</i> | LOC_Os11g36440 | 40.23  | 42.59      | 0.08  | 0.63    | 0.84 |        |
| <i>NOL</i>                               | LOC_Os03g45194 | 13.52  | 33.08      | 1.28  | 0.00    | 0.00 | Up     |
| <i>OsDOS</i>                             | LOC_Os01g09620 | 12.17  | 7.01       | -0.80 | 0.00    | 0.00 | Down   |
| <i>OsGluRS; Cde1(t)</i>                  | LOC_Os02g02860 | 28.12  | 48.28      | 0.77  | 0.00    | 0.01 | Up     |
| <i>OsHAP3A</i>                           | LOC_Os01g61810 | 9.75   | 9.20       | -0.08 | 0.69    | 0.87 |        |
| <i>OsHAP3B</i>                           | LOC_Os05g38820 | 9.25   | 9.93       | 0.10  | 0.61    | 0.83 |        |
| <i>NYC3</i>                              | LOC_Os06g24730 | 6.80   | 7.55       | 0.15  | 0.39    | 0.68 |        |
| <i>OsMADS26</i>                          | LOC_Os08g02070 | 3.22   | 17.99      | 2.47  | 0.00    | 0.00 | Up     |
| <i>RNRL1; V3</i>                         | LOC_Os06g07210 | 2.59   | 2.65       | 0.03  | 0.91    | 0.97 |        |
| <i>RNRS1; Sr1</i>                        | LOC_Os06g14620 | 5.44   | 5.95       | 0.13  | 0.73    | 0.89 |        |
| <i>OsPHR2</i>                            | LOC_Os07g25710 | 17.64  | 17.19      | -0.04 | 0.82    | 0.94 |        |
| <i>OsFRDL1</i>                           | LOC_Os03g11734 | 0.83   | 0.68       | -0.28 | 0.37    | 0.66 |        |
| <i>OsSPX1</i>                            | LOC_Os06g40120 | 32.54  | 24.29      | -0.42 | 0.25    | 0.54 |        |
| <i>SPP</i>                               | LOC_Os06g41990 | 226.97 | 224.20     | -0.02 | 0.91    | 0.97 |        |
| <i>DTH8; Ghd8; OsHAP3H; LHDI; EF8</i>    | LOC_Os08g07740 | 8.58   | 6.71       | -0.35 | 0.10    | 0.32 |        |
| <i>OsLSD1; OsLOL1</i>                    | LOC_Os08g06280 | 38.03  | 33.36      | -0.19 | 0.25    | 0.54 |        |
| <i>SPL3; OsEDR1; OsACDR1; OsMAPKKK1</i>  | LOC_Os03g06410 | 14.58  | 16.82      | 0.20  | 0.23    | 0.51 |        |
| <i>β-OsLcY; zebra324</i>                 | LOC_Os02g09750 | 73.82  | 66.24      | -0.15 | 0.41    | 0.69 |        |
| <i>RLN1; LLM1</i>                        | LOC_Os04g52130 | 165.23 | 250.86     | 0.60  | 0.00    | 0.03 |        |
| <i>etl1</i>                              | LOC_Os11g01210 | 69.25  | 43.88      | -0.65 | 0.00    | 0.03 |        |
| <i>etl2</i>                              | LOC_Os12g01210 | 186.70 | 129.89     | -0.52 | 0.02    | 0.10 |        |
| <i>OsAPX2; APXb</i>                      | LOC_Os07g49400 | 208.22 | 117.78     | -0.82 | 0.01    | 0.08 |        |
| <i>OsWRKY53</i>                          | LOC_Os05g27730 | 47.34  | 72.62      | 0.61  | 0.00    | 0.05 | Up     |
| <i>WSL12; OsNDPK2</i>                    | LOC_Os12g36194 | 23.57  | 45.04      | 0.93  | 0.00    | 0.03 | Up     |
| <i>RLS1</i>                              | LOC_Os02g10900 | 2.61   | 6.02       | 1.20  | 0.00    | 0.00 | Up     |
| <i>OsABC1-2</i>                          | LOC_Os02g36570 | 121.91 | 144.37     | 0.24  | 0.12    | 0.37 |        |
| <i>CHR729; CRL6</i>                      | LOC_Os07g31450 | 14.61  | 14.74      | 0.01  | 0.95    | 0.98 |        |
| <i>OsNUS1-V1</i>                         | LOC_Os03g45400 | 106.32 | 109.78     | 0.04  | 0.78    | 0.92 |        |
| <i>YSA</i>                               | LOC_Os03g40020 | 18.08  | 15.27      | -0.25 | 0.13    | 0.38 |        |
| <i>OsHPL3; cea62</i>                     | LOC_Os02g02000 | 39.07  | 51.38      | 0.39  | 0.09    | 0.31 |        |
| <i>MPR25</i>                             | LOC_Os04g51350 | 13.63  | 18.07      | 0.40  | 0.02    | 0.11 |        |
| <i>YLC1; OsV5A</i>                       | LOC_Os09g21250 | 18.17  | 32.06      | 0.81  | 0.00    | 0.02 | Up     |
| <i>OsPORB; FGL; PGL10</i>                | LOC_Os10g35370 | 184.67 | 258.38     | 0.48  | 0.01    | 0.07 |        |
| <i>Cgal</i>                              | LOC_Os02g12790 | 9.81   | 13.39      | 0.44  | 0.05    | 0.21 |        |
| <i>PAPST1</i>                            | LOC_Os01g16040 | 22.93  | 31.30      | 0.44  | 0.01    | 0.07 |        |
| <i>WSL</i>                               | LOC_Os01g37870 | 21.42  | 26.35      | 0.29  | 0.08    | 0.28 |        |
| <i>OsHO2; OsYLC2</i>                     | LOC_Os03g27770 | 34.88  | 61.14      | 0.80  | 0.00    | 0.01 | Up     |
| <i>HYR</i>                               | LOC_Os03g02650 | 0.78   | 0.93       | 0.22  | 0.58    | 0.81 |        |
| <i>AM1</i>                               | LOC_Os04g58620 | 52.91  | 56.46      | 0.10  | 0.55    | 0.79 |        |
| <i>OsPPR1</i>                            | LOC_Os09g24680 | 1.42   | 1.03       | -0.46 | 0.11    | 0.35 |        |
| <i>OsPDF1B</i>                           | LOC_Os01g45070 | 59.02  | 57.06      | -0.05 | 0.76    | 0.90 |        |
| <i>SPL29; UAP1</i>                       | LOC_Os08g10600 | 6.25   | 6.93       | 0.15  | 0.44    | 0.72 |        |
| <i>SPL33</i>                             | LOC_Os01g02720 | 11.81  | 11.37      | -0.05 | 0.76    | 0.91 |        |
| <i>WLP1</i>                              | LOC_Os01g54540 | 339.98 | 568.88     | 0.74  | 0.00    | 0.01 | Up     |
| <i>OsRH34</i>                            | LOC_Os03g36930 | 9.04   | 13.56      | 0.58  | 0.00    | 0.03 | Up     |
| <i>OsV5B</i>                             | LOC_Os08g32130 | 2.91   | 2.66       | -0.13 | 0.63    | 0.84 |        |
| <i>OsCUL3a</i>                           | LOC_Os02g51180 | 5.51   | 5.39       | -0.03 | 0.88    | 0.96 |        |
| <i>LYL1</i>                              | LOC_Os02g51080 | 740.99 | 830.74     | 0.17  | 0.35    | 0.64 |        |
| <i>AL2; CRS1</i>                         | LOC_Os09g19850 | 41.61  | 51.25      | 0.30  | 0.06    | 0.25 |        |
| <i>ASL2; RPL21c</i>                      | LOC_Os02g15900 | 330.28 | 616.38     | 0.89  | 0.00    | 0.01 | Up     |
| <i>LLB</i>                               | LOC_Os07g14350 | 18.66  | 27.94      | 0.58  | 0.00    | 0.01 | Up     |
| <i>YGL138(t)</i>                         | LOC_Os11g05552 | 56.33  | 80.27      | 0.51  | 0.00    | 0.03 | Up     |
| <i>OsCYO1</i>                            | LOC_Os09g28480 | 13.43  | 11.46      | -0.23 | 0.18    | 0.45 |        |
| <i>RLS3</i>                              | LOC_Os03g38990 | 24.46  | 27.32      | 0.16  | 0.35    | 0.64 |        |
| <i>OsNaPRT1; LT S1</i>                   | LOC_Os03g62110 | 22.93  | 16.73      | -0.45 | 0.01    | 0.07 |        |
| <i>BGL11(t)</i>                          | LOC_Os11g38040 | 2.80   | 2.43       | -0.20 | 0.49    | 0.76 |        |
| <i>TCDS</i>                              | LOC_Os05g34040 | 17.90  | 25.16      | 0.49  | 0.01    | 0.08 |        |
| <i>YSS1</i>                              | LOC_Os04g59570 | 214.49 | 241.29     | 0.17  | 0.29    | 0.58 |        |
| <i>GIC</i>                               | LOC_Os04g57920 | 3.57   | 2.23       | -0.67 | 0.01    | 0.06 |        |
| <i>Fd-GOGAT1; lc7; ABC1; spl23</i>       | LOC_Os07g46460 | 628.62 | 669.76     | 0.09  | 0.56    | 0.80 |        |
| <i>LMR; LRD6-6</i>                       | LOC_Os06g03940 | 12.14  | 13.58      | 0.16  | 0.37    | 0.66 |        |
| <i>OsGATA12</i>                          | LOC_Os03g61570 | 9.32   | 8.42       | -0.14 | 0.46    | 0.74 |        |
| <i>OsFdc2</i>                            | LOC_Os03g48040 | 205.38 | 216.38     | 0.07  | 0.64    | 0.85 |        |
| <i>OsPAP1/OspTAC3; WSL3</i>              | LOC_Os10g32540 | 48.94  | 79.35      | 0.69  | 0.00    | 0.02 | Up     |
| <i>OsAld-Y; ygd1-1</i>                   | LOC_Os06g40640 | 289.66 | 187.83     | -0.62 | 0.00    | 0.04 | Down   |
| <i>TCDD10</i>                            | LOC_Os10g28600 | 81.80  | 98.94      | 0.27  | 0.09    | 0.30 |        |
| <i>WSP1</i>                              | LOC_Os04g51280 | 331.01 | 354.71     | 0.10  | 0.53    | 0.78 |        |
| <i>YGL8</i>                              | LOC_Os01g17170 | 356.29 | 600.84     | 0.75  | 0.00    | 0.01 | Up     |
| <i>YLI</i>                               | LOC_Os02g05890 | 53.18  | 96.68      | 0.86  | 0.00    | 0.00 |        |
| <i>OsDG2</i>                             | LOC_Os02g39340 | 20.21  | 28.89      | 0.51  | 0.01    | 0.05 |        |
| <i>OsValRS2; WP1</i>                     | LOC_Os07g06940 | 31.45  | 50.24      | 0.67  | 0.00    | 0.02 | Up     |
| <i>ALI</i>                               | LOC_Os03g31150 | 61.89  | 81.98      | 0.40  | 0.01    | 0.08 |        |
| <i>GRY79</i>                             | LOC_Os02g33610 | 191.54 | 189.43     | -0.02 | 0.91    | 0.97 |        |
| <i>OsABC18</i>                           | LOC_Os11g29850 | 7.89   | 8.68       | 0.14  | 0.48    | 0.75 |        |

**Table S3.** Significant alterations of genes involved in photosynthesis pathway in comparison of *bz1* leaf RNA-Sequencing data to that of the WT.

| Accession      | WT     | <i>bz1</i> | Log2 Ratio | P    | FDR  | Description                                                                   |
|----------------|--------|------------|------------|------|------|-------------------------------------------------------------------------------|
| LOC_Os01g57962 | 3.58   | 1.69       | -1.08      | 0.04 | 0.18 | photosystem I P700 chlorophyll a apoprotein A2, putative, expressed           |
| LOC_Os01g57964 | 2.36   | 1.01       | -1.22      | 0.02 | 0.12 | photosystem I P700 chlorophyll a apoprotein A1, putative, expressed           |
| LOC_Os03g55874 | 4.99   | 1.99       | -1.32      | 0.03 | 0.17 | ATP synthase subunit beta, putative, expressed                                |
| LOC_Os04g16748 | 166.12 | 69.50      | -1.26      | 0.00 | 0.03 | ATP synthase B chain, putative, expressed                                     |
| LOC_Os04g16740 | 71.11  | 31.80      | -1.17      | 0.00 | 0.04 | ATP synthase subunit alpha, putative, expressed                               |
| LOC_Os04g16872 | 8.81   | 3.69       | -1.25      | 0.02 | 0.12 | photosystem II D2 protein, putative, expressed                                |
| LOC_Os05g01675 | 8.30   | 3.41       | -1.29      | 0.03 | 0.15 | photosystem I P700 chlorophyll a apoprotein A1, putative, expressed           |
| LOC_Os06g02980 | 1.35   | 0.44       | -1.60      | 0.00 | 0.03 | ATP synthase F1, epsilon subunit family protein, expressed                    |
| LOC_Os06g39756 | 3.74   | 1.06       | -1.78      | 0.00 | 0.04 | ATP synthase epsilon chain, putative, expressed                               |
| LOC_Os07g05360 | 1.16   | 0.34       | -1.77      | 0.00 | 0.03 | photosystem II 10 kDa polypeptide, chloroplast precursor, putative, expressed |
| LOC_Os07g22498 | 32.34  | 15.45      | -1.07      | 0.00 | 0.04 | photosystem I iron-sulfur center, putative, expressed                         |
| LOC_Os10g21230 | 11.36  | 4.83       | -1.22      | 0.04 | 0.18 | ATP synthase C chain, putative, expressed                                     |
| LOC_Os10g21238 | 6.49   | 2.49       | -1.38      | 0.02 | 0.13 | ATP synthase B chain, putative, expressed                                     |
| LOC_Os10g21240 | 16.66  | 7.25       | -1.20      | 0.00 | 0.02 | ATP synthase, putative, expressed                                             |
| LOC_Os10g21250 | 1.81   | 0.73       | -1.29      | 0.02 | 0.11 | photosystem I P700 chlorophyll a apoprotein A1, putative, expressed           |
| LOC_Os10g21266 | 2.89   | 1.04       | -1.46      | 0.01 | 0.08 | ATP synthase subunit beta, putative, expressed                                |
| LOC_Os10g21406 | 13.92  | 5.60       | -1.32      | 0.00 | 0.03 | photosystem I iron-sulfur center, putative, expressed                         |
| LOC_Os10g38229 | 3.08   | 1.14       | -1.44      | 0.01 | 0.06 | photosystem I P700 chlorophyll a apoprotein A1, putative, expressed           |
| LOC_Os10g38272 | 88.32  | 32.73      | -1.44      | 0.00 | 0.01 | ATP synthase B chain, putative, expressed                                     |
| LOC_Os10g39880 | 9.09   | 2.70       | -1.73      | 0.05 | 0.20 | photosynthetic reaction center protein, putative, expressed                   |
| LOC_Os10g41689 | 1.72   | 0.53       | -1.69      | 0.01 | 0.07 | photosystem II D2 protein, putative, expressed                                |

**Table S4.** Primers used for qRT-PCR analysis

| Gene              | Locus          | Annotation                                            | Forward primers      | Reverse primers       |
|-------------------|----------------|-------------------------------------------------------|----------------------|-----------------------|
| <i>Actin1</i>     | LOC_Os03g50885 | Actin                                                 | ACCATTGGTGCTGAGCGTTT | CGCAGCTTCCATTCCATGAA  |
| <i>UGE1</i>       | LOC_Os05g51670 | UDP-Glu/Gal epimerase 1                               | TGGAACCGACTACAACACCA | CAGCAAATACAAGCGGGATT  |
| <i>BZ1 (UGE2)</i> | LOC_Os08g28730 | UDP-Glu/Gal epimerase 2                               | CTAAAAGCTGTGGCGAAAG  | TGCCATATGGATTGTTTGGGA |
| <i>UGE3</i>       | LOC_Os09g35800 | UDP-Glu/Gal epimerase 3                               | CCCAACAACCTTCTCCGTA  | AAGCCACACAACCAATGTCA  |
| <i>UGE4</i>       | LOC_Os09g15420 | UDP-Glu/Gal epimerase 4                               | CGTTCATTTTGTGGTCTGA  | ACGGCAAATCTCCTCTGCTA  |
| <i>AGP1</i>       | LOC_Os08g37630 | Arabinogalactan protein 1                             | TGGCCATGGCCGCGCTCTT  | AAACCGGGGAGGCGCTCGT   |
| <i>AGP2</i>       | LOC_Os01g71170 | Arabinogalactan protein 2                             | TTCCTCCTCGTACTCGTGCT | GGAGCAGCGCATTATGT     |
| <i>AGP14</i>      | LOC_Os01g37950 | Arabinogalactan protein 14                            | ATGGCCAGGTTCTCCGCA   | AAATACACAGATCCCAAACC  |
| <i>AGP17</i>      | LOC_Os01g55220 | Arabinogalactan protein 17                            | AAGGCCCTTGGCTCTCCTCT | GAAGCCAGGAGCGAGAC     |
| <i>AGP20</i>      | LOC_Os02g16500 | Arabinogalactan protein 20                            | CTCGTCGTGGCATCTTC    | GGGAGAAGAAGCATCCAGTG  |
| <i>AGP29</i>      | LOC_Os01g42210 | Arabinogalactan protein 29                            | GCCTTGTTGGCATCAATT   | TGGCAGTGACTTGAGGTCTG  |
| <i>FLA1</i>       | LOC_Os04g48490 | Fasciclin-like AGP1                                   | AAGAAGCTGCACTCCCTCAG | CCTCAAGAACGGAGAGGTTG  |
| <i>FLA5</i>       | LOC_Os08g39270 | Fasciclin-like AGP5                                   | GAATCCAAGCAGCCATGAT  | GTCCGCTTCTCCAGGAGGT   |
| <i>FLA10</i>      | LOC_Os09g30010 | Fasciclin-like AGP10                                  | GTTCTGCCCAGGTACAAGA  | GTTCTGCACCGTGAAGTTGT  |
| <i>FLA21</i>      | LOC_Os02g49420 | Fasciclin-like AGP21                                  | CCCTACAACATCTCCGTGCT | TTCTTCTTGCACCATCTCC   |
| <i>DVR</i>        | LOC_Os03g22780 | Divinyl-reductase                                     | CCGTCCTTACCTACAGCAT  | CGATGGGGAGGATCTTGTT   |
| <i>YGL1</i>       | LOC_Os05g28200 | Prenyltransferase                                     | TTGGGCACTGTTGTAGCAG  | CAATGTAGCTGCACCAAGA   |
| <i>CAO1</i>       | LOC_Os10g41780 | Chlorophyllide a oxygenase                            | GCTGCTTACCGGATGTCTC  | ACAACCGATACCGGATACCA  |
| <i>ClpP</i>       | LOC_Os03g29810 | Clp protease                                          | GATCAAGCCCAAAGTTGGAA | CCAAGTTTGCCCAAGTAAA   |
| <i>ChlD</i>       | LOC_Os03g59640 | Magnesium-chelatase subunit chlD                      | AAAGAATGGCTCGAAAAGCA | GCCACCACATGGTAGCTTCT  |
| <i>ChlH</i>       | LOC_Os03g20700 | Magnesium-chelatase subunit chlH                      | TGGAGCAGCTCTGCACTAGA | TTGGAGGACGGAGTAGATGG  |
| <i>ChlI</i>       | LOC_Os03g36540 | Magnesium-chelatase subunit chlI                      | ATGGAACACCGTGGAGAGAG | GCTGGAGCTTGCTTTGTTCC  |
| <i>SGR</i>        | LOC_Os09g36200 | Senescence-inducible chloroplast stay-green protein 1 | AGGGGTGGTACAACAAGCTG | GCTCCTTGCGGAAGATGTAG  |
| <i>V1</i>         | LOC_Os03g45400 | Antitermination NusB domain                           | TTTAGTGGCTGTTGCCAGTG | TCCATTGATTACCCGAGGAG  |
| <i>V2</i>         | LOC_Os03g20460 | Guanylate kinase                                      | AAGGAGCAGCAACCTTGAGA | GCGTTTACCTCTTCTCTGG   |
| <i>NOL</i>        | LOC_Os03g45194 | Oxidoreductase                                        | TGGTGCAACGAAGAGAAGTG | ACGAGATAATCCGCAACCAC  |
| <i>GluRS</i>      | LOC_Os02g02860 | Glutamyl-tRNA synthetase                              | ATTTGGCACTTCTTGTTGG  | AATGCCTGTCTCTCCATC    |
